# Supplementary material
Source: PubMed Central journal article supplement (PMC193550)
Supplement: pnas_1834070100_6.pdf [file pnas_1834070100_6.pdf]

a

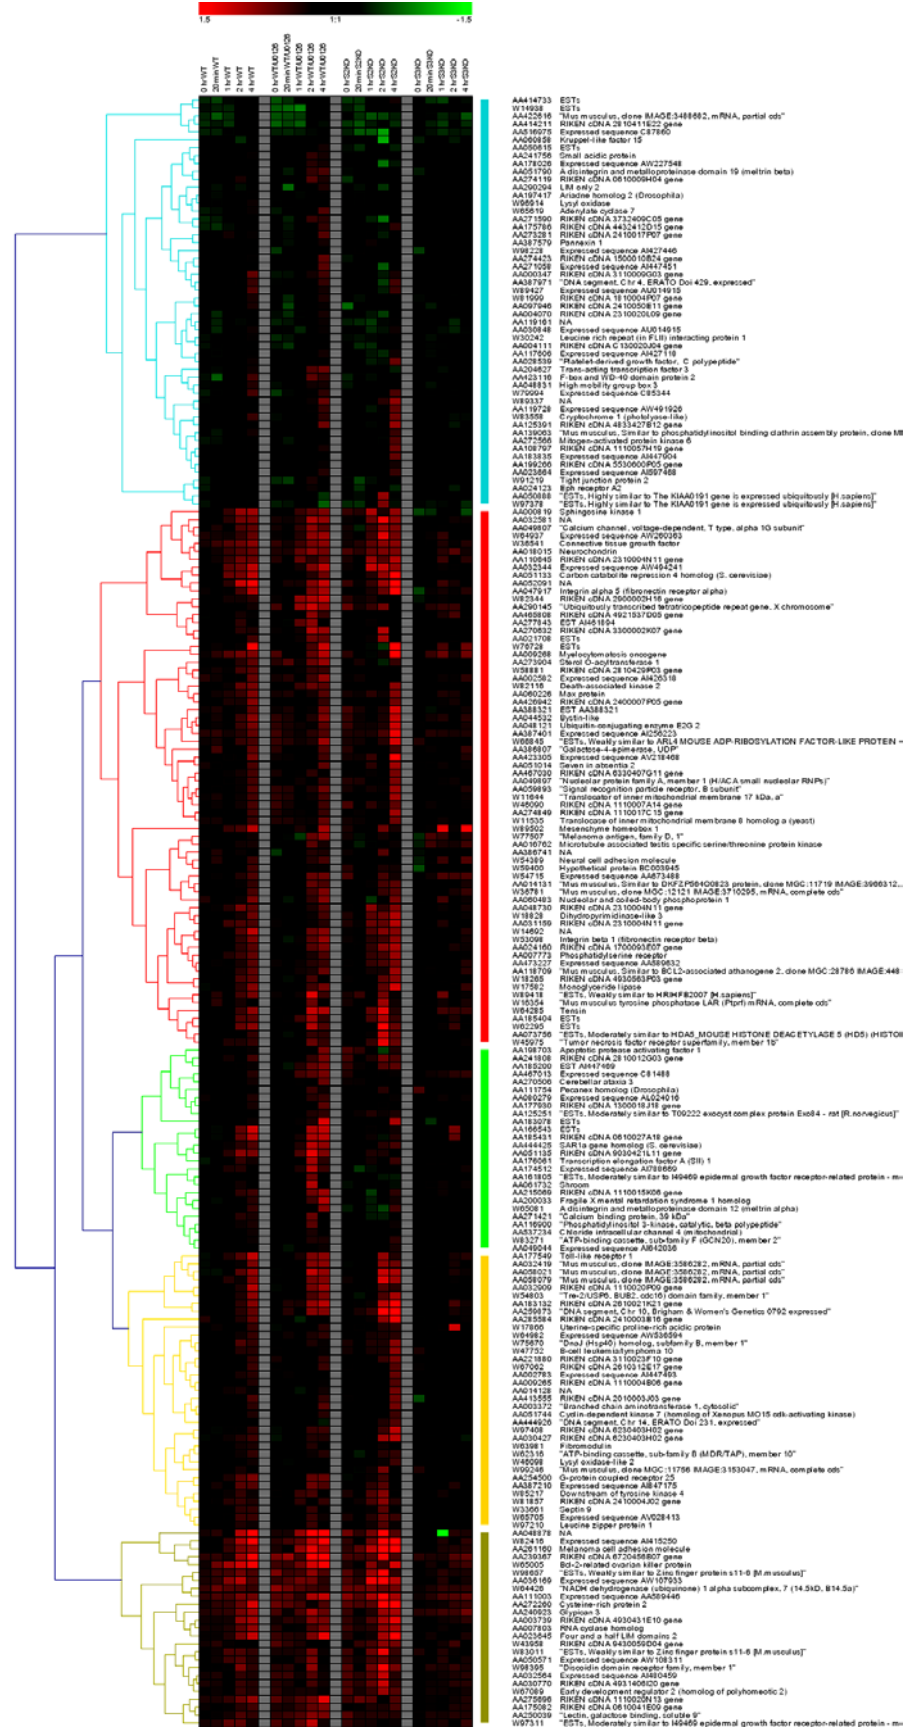

AA414733 ESTs  
W19059 ESTs  
AA422616 "Mus musculus, clone MIAQE.3488662, mRNA, partial cds"  
AA422616 RIKEN cDNA 241041122 gene  
AA419076 Expressed sequence AC7860  
AA400616 Kruppel-like factor 15  
AA409815 ESTs  
AA414736 Small acidic protein  
AA179208 Expressed sequence AV227548  
AA051760 A-disintegrin and metalloprotease domain 10 (metrin beta)  
AA427416 RIKEN cDNA 081000404 gene  
AA300204 LMI only 2  
AA197417 Arabinose homologue 2 (Drosophila)  
W85614 Lyf1 endase  
W85610 Adenylate cyclase 7  
AA271500 RIKEN cDNA 373240C05 gene  
AA172786 RIKEN cDNA 4432412015 gene  
AA222381 RIKEN cDNA 241001707 gene  
AA387879 Porphyrin 1  
W8223 Expressed sequence AM27446  
AA274243 RIKEN cDNA 1500010824 gene  
AA274026 Expressed sequence AM47451  
AA030147 "DNA segment, Chr 4, ERATO Dori 429, expressed"  
AA181771 "DNA segment, Chr 4, ERATO Dori 429, expressed"  
W81927 Expressed sequence AD214915  
W81909 RIKEN cDNA 181000407 gene  
AA007840 RIKEN cDNA 2410050811 gene  
AA040470 RIKEN cDNA 2310020106 gene  
AA119181 NA  
AA026448 Expressed sequence AL014515  
W30242 Leucine rich repeat (in F18) interacting protein 1  
AA041111 RIKEN cDNA C13002004 gene  
AA117606 Expressed sequence AK27118  
AA028266 "M-Med1-related gene R, factor, C polyprotein"  
AA024827 Trans-acting transcription factor 3  
AA021186 F-box and TUD-0 domain protein 2  
AA048311 High-mobility group box 3  
W50004 Expressed sequence CE244  
W80337 NA  
AA119228 Expressed sequence AV491926  
W83550 Cytoskeleton 1 (paleo/paleo-like)  
AA125014 RIKEN cDNA 4833427610 gene  
AA135003 "Mus musculus, similar to phosphotyrosine binding domain assembly protein, clone M8"  
AA027566 Mitogen-activated protein kinase 6  
AA108767 RIKEN cDNA 1110057410 gene  
AA118315 Expressed sequence AM27054  
AA186206 RIKEN cDNA 353000P05 gene  
AA023884 Expressed sequence AB97488  
W91210 Tight junction protein 2  
W91209 E3b1 receptor 2  
AA050888 "ESTs, Highly similar to The KIAA0161 gene is expressed ubiquitously [H sapiens]"  
W97379 "ESTs, Highly similar to The KIAA0161 gene is expressed ubiquitously [H sapiens]"  
AA020010 NA  
AA033818 NA  
AA049507 "Calcium channel, voltage-dependent, T type, alpha 10 subunit"  
W85017 Expressed sequence AV292923  
W328541 Connective tissue growth factor  
AA028251 Neoplasmin  
AA119545 RIKEN cDNA 2310004111 gene  
AA033344 Expressed sequence AM48241  
AA021133 Carbon tetrachloride repression 4 homolog (C. cerevisiae)  
AA020291 NA  
AA047317 Integrin alpha 2 (fibronectin receptor alpha)  
W82344 RIKEN cDNA 280000416 gene  
AA020145 "Ubiquitin transmembrane metalloprotease repeat gene, X chromosome"  
AA488026 RIKEN cDNA 0812137003 gene  
AA277843 EST AM41804  
AA276832 RIKEN cDNA 3330002K07 gene  
AA011708 ESTs  
W19729 ESTs  
AA092208 Myelocytomatosis oncogene  
AA271024 Chemokine 1  
W328811 RIKEN cDNA 281042P03 gene  
AA020292 Expressed sequence AM20518  
W82116 Death-associated kinase 2  
AA060208 Max protein  
AA426842 RIKEN cDNA 2400007P05 gene  
AA481151 EST AM38321  
AA045232 Ubiquitin-conjugating enzyme E2C 2  
AA081111 Bystin-like  
AA37401 Expressed sequence AC25223  
W86840 "ESTs, Weakly similar to ARL4 MOUSE ADP-RIBOSYLATION FACTOR-LIKE PROTEIN -"  
AA438907 "Glycylase-4-pore-ase, UCP"  
AA021305 Expressed sequence AV21848  
AA051014 Swain in atsan 2  
AA050210 RIKEN cDNA 6320470711 gene  
AA049507 "Nucleolar protein family A, member 1 (NACA, small nucleolar RNPs)"  
AA050693 "Signal recognition particle receptor, B subunit"  
W11844 "Translocator of inner mitochondrial membrane 17 kDa, a"  
W80920 RIKEN cDNA 11100714 gene  
AA274849 RIKEN cDNA 1110017C15 gene  
W11035 Translocator of inner mitochondrial membrane 8 homolog a (yeast)  
W83502 Maspin-like homeobox 1  
W19707 "MafKinasin antigen, family D, 1"  
AA010762 Microtubule associated lectin specific serine/threonine protein kinase  
AA036741 NA  
W12635 Neural cell adhesion molecule  
AA020010 Neurophilin-like protein BC033845  
W84715 Expressed sequence AM47348  
AA020010 "Mus musculus, similar to EGF2P640023 protein, clone MGC-11719 MIAQE.3966312."  
W326781 "Mus musculus, clone MGC-12121 MIAQE.3710255, mRNA, complete cds"  
AA038483 Nucleolar and outer body phosphoprotein  
AA048730 RIKEN cDNA 2310004111 gene  
W18929 Dihydroxydipicolinate 3  
AA031199 RIKEN cDNA 2310004111 gene  
W14802 NA  
W32096 Integrin beta 1 (fibronectin receptor beta)  
AA024160 RIKEN cDNA 170000P09 gene  
AA020773 Phosphotyrosine receptor  
AA110337 Expressed sequence AM28632  
AA118709 "Mus musculus, similar to ECL2-associated atlanogen 2, clone MGC-28765 MIAQE.448"  
W12692 RIKEN cDNA 083288P05 gene  
W11562 Monoglyceride lipase  
W83814 "ESTs, Weakly similar to H8M5E2007 [H sapiens]"  
W18324 "Mus musculus tyrosine phosphatase LAR (LPTP) mRNA, complete cds"  
AA185404 ESTs  
W82590 ESTs  
AA073796 "ESTs, Moderately similar to HDAS, MOUSE HISTONE DEACETYLASE 5 (HD5) (HISTON"  
W82079 "Tyrosine receptor factor receptor tyrosine family, member 10"  
AA188703 Aglycosyl protein anchoring factor 1  
AA241058 RIKEN cDNA 2310012003 gene  
AA182309 EST AM47406  
AA049713 Expressed sequence C1489  
AA070506 Cerebellar ataxin 3  
AA111754 Peptide homology (Drosophila)  
AA062679 Expressed sequence AM24016  
AA117950 RIKEN cDNA 160001818 gene  
AA125251 "ESTs, Moderately similar to T00222 oncotag complex protein Ex04 - rat [R. norvegicus]"  
AA186543 ESTs  
AA186543 RIKEN cDNA 0810027A18 gene  
AA444235 SART1 gene homology (C. cerevisiae)  
AA051135 RIKEN cDNA 090401111 gene  
AA176981 Transcription elongation factor A (TIF) 1  
AA114512 Expressed sequence AM28690  
AA181805 "ESTs, Moderately similar to 145460 epidermal growth factor receptor-related protein - mu"  
AA018732 Shoon  
AA210696 RIKEN cDNA 1110015906 gene  
AA200033 Fingly X mental retardation syndrome 1 homolog  
W90091 A-disintegrin and metalloprotease domain 12 (metrin alpha)  
AA271141 Cytoskeleton binding protein 18 kDa  
AA119900 "Phosphotyrosine kinase, cyto/c, beta polypeptide"  
AA081734 Cytoskeleton intermediate filament (actin filament)  
W82371 "ATP-binding cassette, sub-family F (ABCN20), member 2"  
AA026044 Expressed sequence AM12036  
AA177549 Toll-like receptor 1  
AA026119 "Mus musculus, clone MIAQE.158282, mRNA, partial cds"  
AA026211 "Mus musculus, clone MIAQE.158282, mRNA, partial cds"  
AA026276 "Mus musculus, clone MIAQE.228282, mRNA, partial cds"  
AA031209 RIKEN cDNA 1110020P09 gene  
W84603 "Tn-C12SRP, BL282, cds:101 domain family, member 1"  
AA183132 RIKEN cDNA 2810021K21 gene  
AA256792 "DNA segment, Chr 10, Eghom"  
AA285884 RIKEN cDNA 24100081816 gene  
W17809 Ubiquitin-specific protease-10 acidic protein  
W84682 Expressed sequence AV235594  
W84681 "DnaJ (Hsp40) homolog, subfamily B, member 1"  
W47752 B-cell leukemia lymphoma 10  
AA211860 RIKEN cDNA 2310023710 gene  
W87002 RIKEN cDNA 2810312517 gene  
AA020010 Expressed sequence AM47453  
AA006285 RIKEN cDNA 1110004806 gene  
AA014135 NA  
AA413555 RIKEN cDNA 2510003J03 gene  
AA020172 "Branched chain aminotransferase 1, cytosolic"  
AA048420 "DNA segment, Chr 16, ERATO Dori 231, expressed"  
W97408 RIKEN cDNA 8230403K02 gene  
AA020127 RIKEN cDNA 8230403K02 gene  
W819811 Fibronectin  
W82116 "ATP binding cassette, sub-family B (MDR/TAP), member 10"  
W49098 Lysyl oxidase-like 2  
AA026119 "Mus musculus, clone MGC-11766 MIAQE.3153047, mRNA, complete cds"  
AA234200 G-protein coupled receptor 25  
AA287180 Expressed sequence AM47716  
W82517 C-terminal domain of tyrosine kinase 4  
W81987 RIKEN cDNA 2410004822 gene  
W33901 Septin 9  
W82501 Expressed sequence AV028415  
W87210 Leucine zipper protein 1  
AA026119 NA  
W82416 Expressed sequence AM15250  
AA281780 Malanzina cell adhesion molecule  
AA030367 RIKEN cDNA 8720458007 gene  
W82007 Bcl-2-related domain like protein  
W80827 "ESTs, Weakly similar to 2.5c finger protein s11-6 [M. musculus]"  
AA021186 Expressed sequence AM10753  
W84420 "TADM dehydrogenase (ubiquinone) 1 alpha subcomplex, 7 (14.5D, B14.5)"  
AA111001 Expressed sequence AM09446  
AA222260 Cysteine-rich protein 2  
AA026119 NA  
AA003739 RIKEN cDNA 4930431E10 gene  
AA020119 RNA codase homolog  
AA035445 RIKEN cDNA 640359204 gene  
W18959 Four and a half LIM domain 2  
W83011 "ESTs, Weakly similar to 2.5c finger protein s11-6 [M. musculus]"  
AA020119 Expressed sequence AM108111  
W83935 "Discoidin domain receptor family, member 1"  
AA023064 "Discoidin domain receptor family, member 1"  
AA030770 RIKEN cDNA 493140620 gene  
W87099 Early development receptor 2 (homolog of polyhomeotic 2)  
AA027698 RIKEN cDNA 1110025N13 gene  
AA115682 RIKEN cDNA 0810011E09 gene  
AA020039 "Lectin, galactose binding, sulfate 9"  
W97511 "ESTs, Moderately similar to 145460 epidermal growth factor receptor-related protein - mu"
