# Supplementary material
Source: PubMed Central journal article supplement (PMC193550)

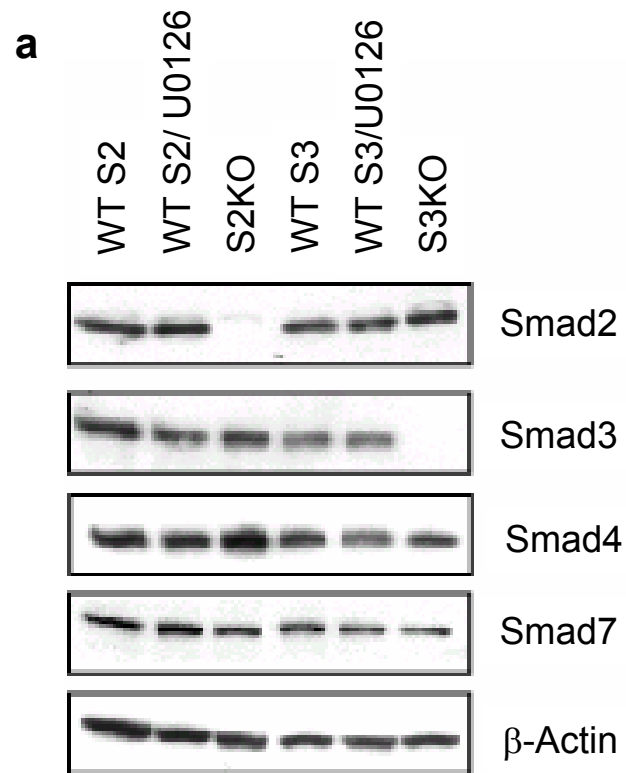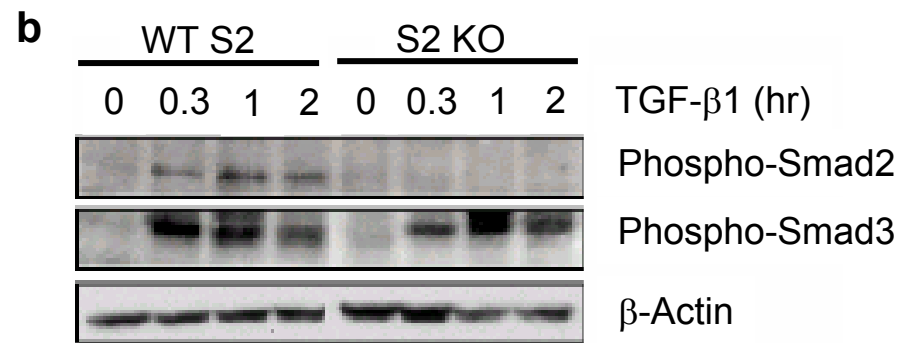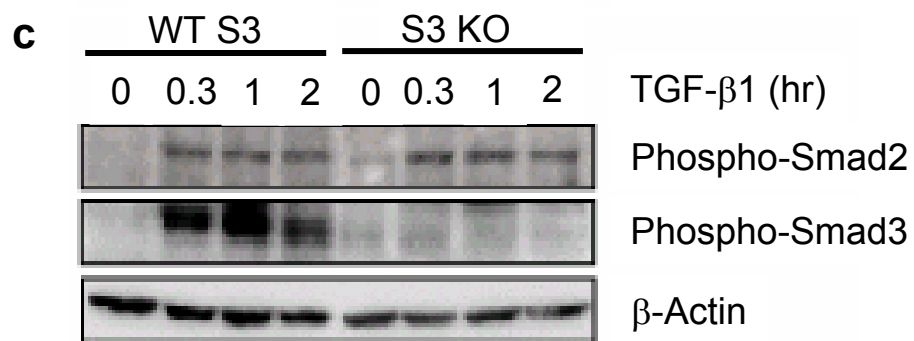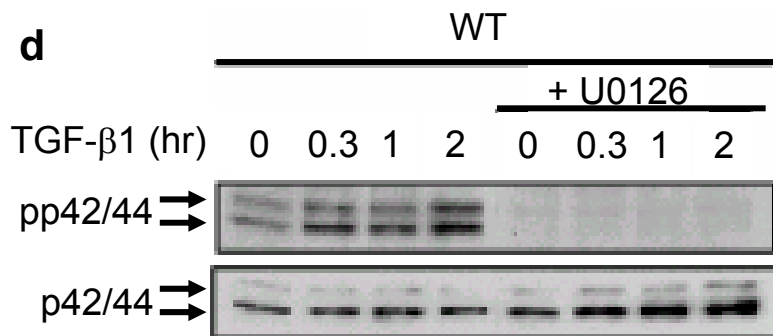

Supplement: pnas_1834070100_3.pdf [file pnas_1834070100_3.pdf]

b

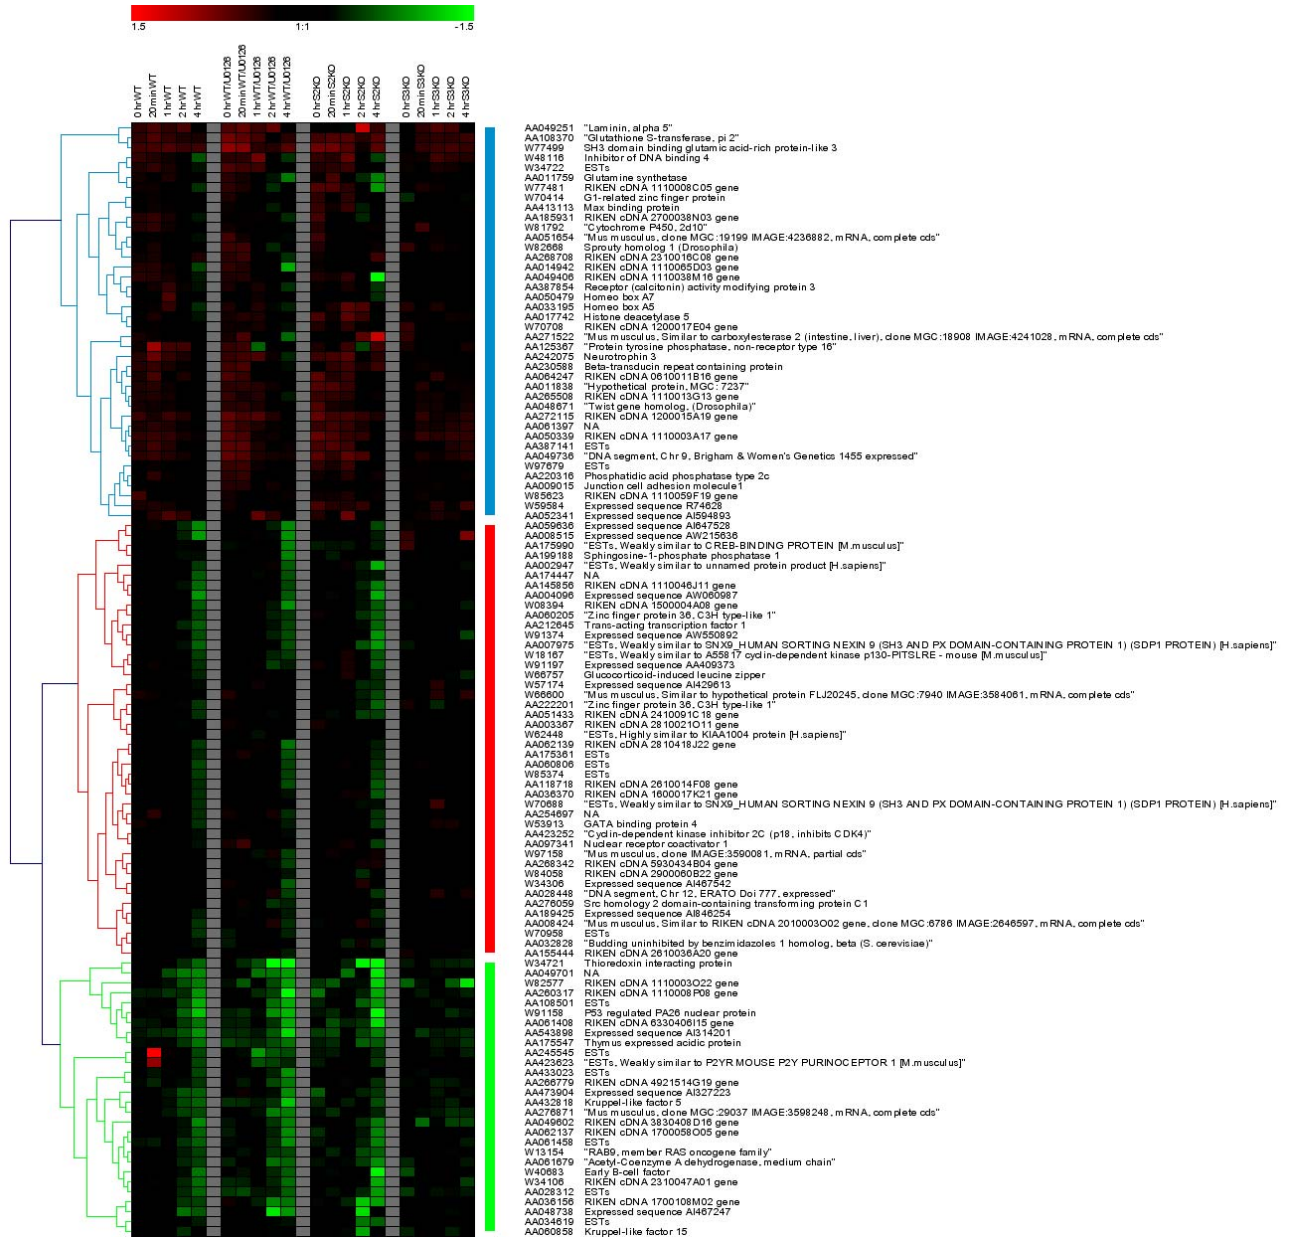

Supplement: pnas_1834070100_7.pdf [file pnas_1834070100_7.pdf]
